# Supplementary material for: Peroxisomes are platforms for cytomegalovirus’ evasion from the cellular immune response
Source: PubMed Central journal article supplement (PMC4867596; doi:10.1038/srep26028), 2016-05-16
Supplement: srep26028-s1.pdf [file srep26028-s1.pdf]

**Peroxisomes are platforms for cytomegalovirus' evasion from the cellular immune response**

Ana Cristina Magalhães<sup>1#</sup>, Ana Rita Ferreira<sup>1#</sup>, Sílvia Gomes<sup>1</sup>, Marta Vieira<sup>1</sup>, Ana Gouveia<sup>1</sup>, Isabel Valença<sup>1</sup>, Markus Islinger<sup>2</sup>, Rute Nascimento<sup>3</sup>, Michael Schrader<sup>4</sup>, Jonathan C. Kagan<sup>5</sup> and Daniela Ribeiro<sup>1\*</sup>

# co-authorship

Affiliations: <sup>1</sup>Institute for Research in Biomedicine – iBiMED, Department of Medical Sciences & Department of Biology, University of Aveiro, Aveiro, Portugal, <sup>2</sup>Neuroanatomy, Center for Biomedicine and Medical Technology Mannheim, University of Heidelberg, Heidelberg, Germany, <sup>3</sup>Infections and Immunity Laboratory, Instituto Gulbenkian de Ciência, Oeiras, Portugal, <sup>4</sup>College of Life and Environmental Sciences, Biosciences, University of Exeter, Exeter, Devon, UK, <sup>5</sup>Division of Gastroenterology, Boston Children's Hospital and Harvard Medical School, Boston, MA, USA

# Supplementary Information

**A**

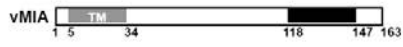

**B**

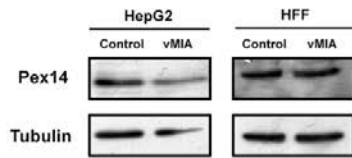

**C**

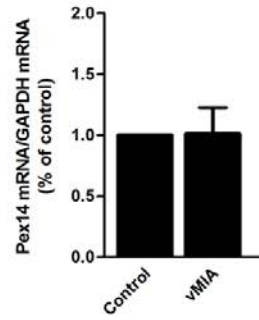

**D**

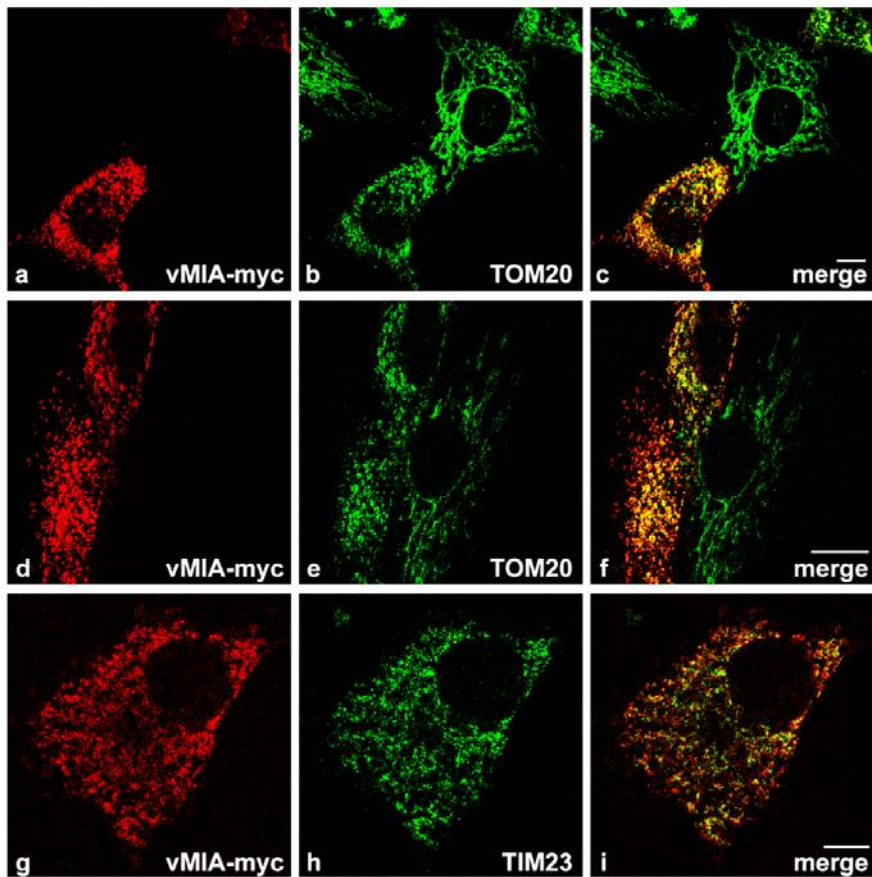

**Figure S1**– A- Schematic representation of vMIA topology. vMIA is constituted by 163 amino acids. In the N-terminal it contains a transmembrane domain (TM), localized between the amino acids 5 – 34. The C-terminal functional domain (in black) is located between the amino acids 118-147. Adapted from

## Supplementary Information

Goldmacher V. 2002. B- Western blot analysis of the Pex14 expression in the absence or presence of vMIA in HepG2 and HFF cells. Representative image of three independent experiments. Tubulin was used as a loading control. C- RT-qPCR analysis of Pex14 mRNA production in the absence or presence of vMIA in Mefs MAVS-Pex cells. GAPDH was used as control. Data represents the means  $\pm$  SEM of three independent experiments. Error bars represent SEM. D- (a-c) vMIA intracellular localization in HepG2 cells (a) vMIA-myc, (b) TOM20 and (c) merge image of a and b. (d-f) vMIA intracellular localization in HFF cells (d) vMIA-myc, (e) TOM20 and (f) merge image of d and e. (g-i) vMIA intracellular localization in Mefs MAVS-Pex cells (g) vMIA-myc, (h) TIM23 and (i) merge image of g and h. Confocal images from immunofluorescence staining. Bars represent 10  $\mu$ m.

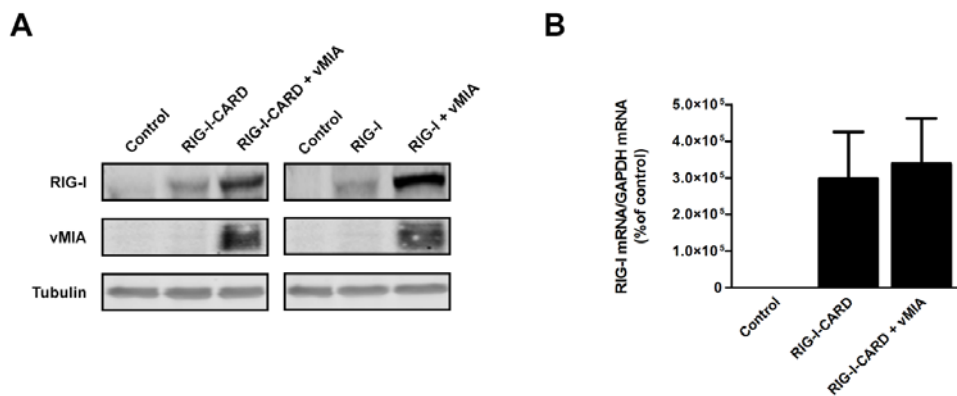

**Figure S2** – A- Western blot analysis of the production of GFP-RIG-I-CARD and GFP-RIG-I in Mefs MAVS-Pex cells in the presence or absence of vMIA. Tubulin was used as a loading control. B- RT-qPCR analysis of RIG-I mRNA in Mefs MAVS-Pex cells stimulated with GFP-RIG-I-CARD in the presence or absence of vMIA (performed with primers annealing with the human RIG-I, in order to solely analyse the transfected human GFP-RIG-I-CARD). GAPDH was used as control. Data represents the means  $\pm$  SEM of three independent experiments. Error bars represent SEM.
